# Supplementary material
Source: PubMed Central journal article supplement (PMC2988472)

## Supplementary Figure Captions

**Supplemental Figure 1.** Knockdown of TR3 inhibits cell growth (A and B) and induces apoptosis (C and D) in L3.6pl and MiaPaCa-2 human pancreatic cancer cells. Cells were transfected with siScr or siTR3 as indicated and cell numbers or western blots of whole cell lysates were determined as described in the Materials and Methods (\* significantly decreased growth;  $p < 0.05$ ).

**Supplemental Figure 2.** Transactivation activity of endogenous TR3 is inhibited by DIM-C-pPhOH in Panc-1 cells. Panc-1 cells were transfected with NurRE-Luc (0.2  $\mu\text{g}$ ) for 5 hr, and treated with 20  $\mu\text{M}$  of DIM-C-pPhOH for 18 hr in the presence or absence of PMA (15 nM). Luciferase activity (relative to  $\beta$ -galactosidase activity) was determined as described in the Materials and Methods (\* significantly induced activity; \*\* significantly inhibition by DIM-C-pPhOH;  $p < 0.05$ ).

**Supplemental Figure 3.** DIM-C-pPhOH-mediated inhibition of cell proliferation and induction of apoptosis were partially rescued by overexpression of TR3. (A) Panc1 cells were transfected with either Flag-empty (0.5  $\mu\text{g}$ ) or Flag-TR3 (0.5  $\mu\text{g}$ ), and treated with various concentrations of DIM-C-pPhOH for 24 hr. The number of cells in each well was counted. (B and C) Panc1 cells were transfected with either Flag-empty (0.5  $\mu\text{g}$ ) or Flag-TR3 (0.5  $\mu\text{g}$ ), and treated with various concentrations of DIM-C-pPhOH for 24 hr. The intensity of protein expression was quantitated using ImageJ software (National

Institutes of Health, Bethesda, MD). Significance between different treatment groups is indicated.

**Supplemental Figure 4.** Effects of DIM-C-pPhOH on Sp1-TR3 interactions. Coimmunoprecipitation. Panc-1 cells were transfected with either Flag-empty (1  $\mu$ g) or Flag-TR3 (1  $\mu$ g), and treated with either DMSO or various concentrations of DIM-C-pPhOH for 6 hr. Cell extract were then immunoprecipitated with Flag antibodies, and immunoprecipitates were analyzed by Western blot analysis using anti-Sp1 and anti-TR3 antibodies.

Supplemental Figure 1

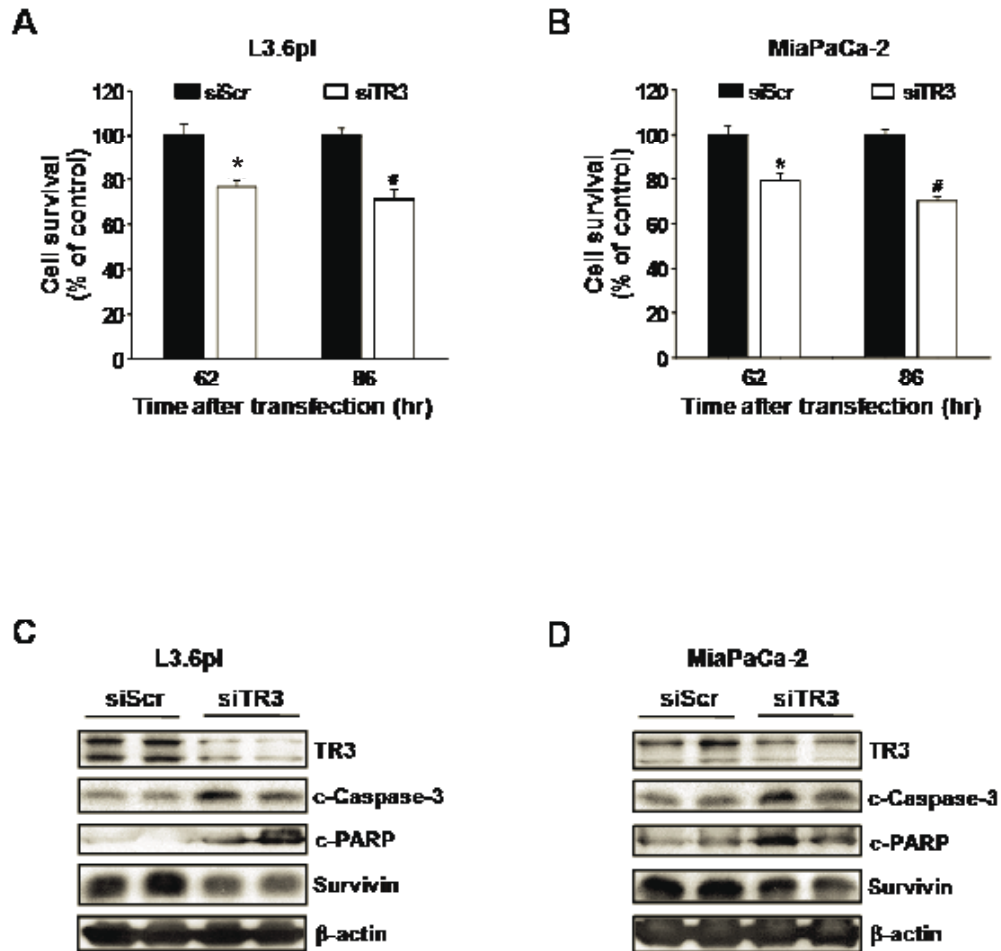

Supplemental Figure 2

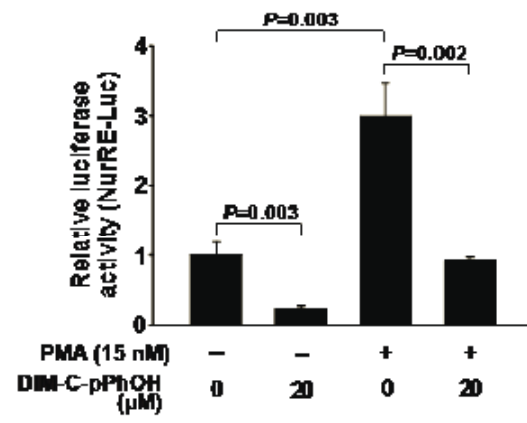

### Supplemental Figure 3

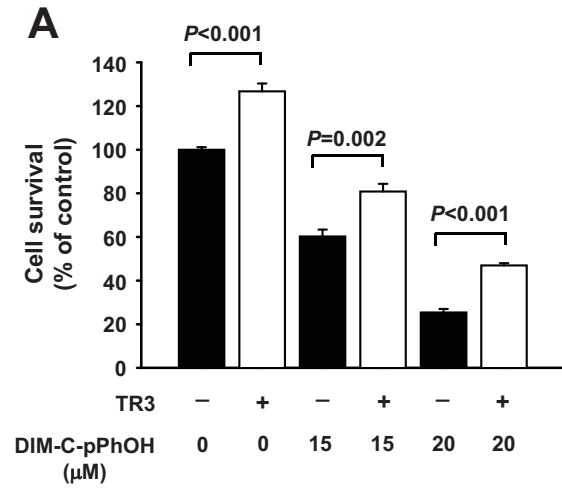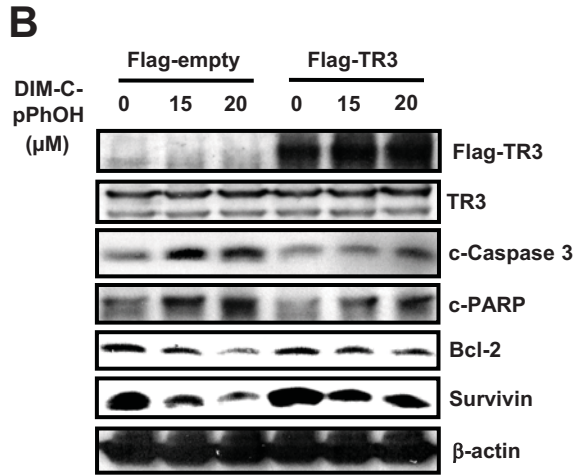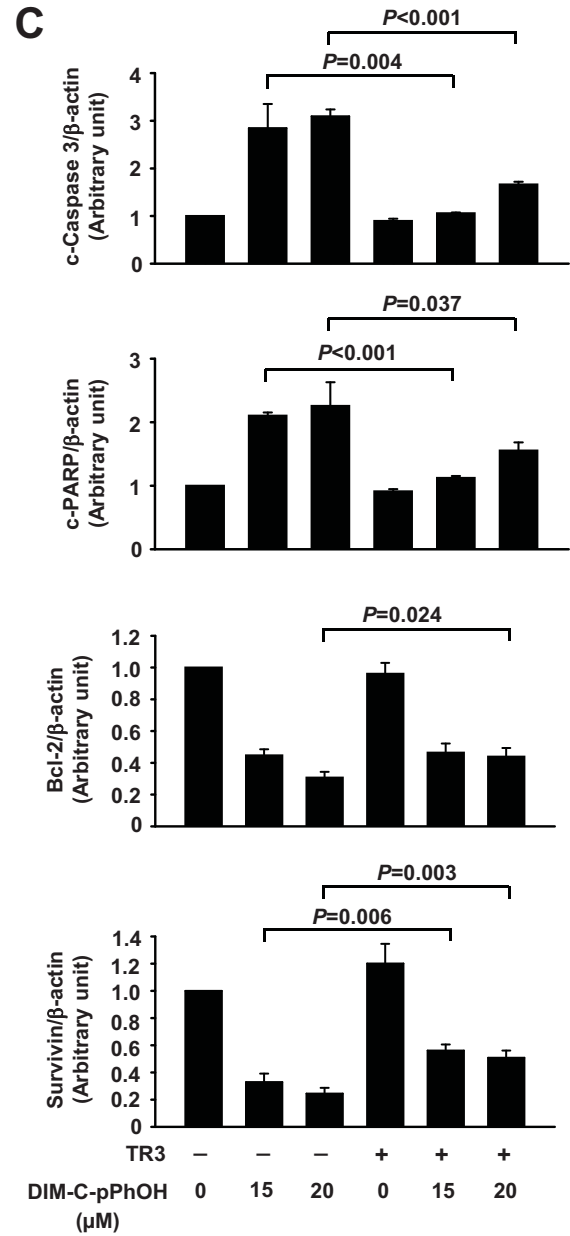

### Supplemental Figure 4

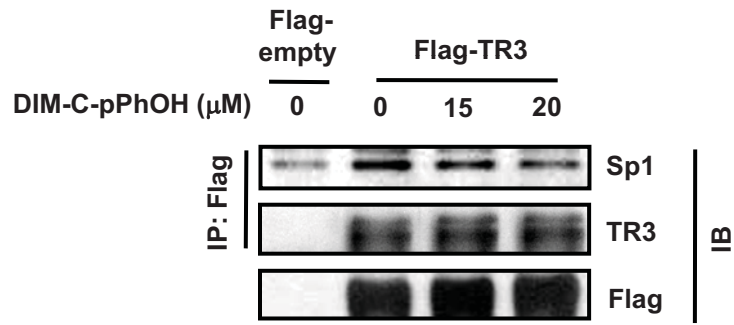

Supplement: NIHMS222444-supplement-1.pdf [file NIHMS222444-supplement-1.pdf]
